# Supplementary material for: Cytogenetic abnormalities in multiple myeloma: association with disease characteristics and treatment response
Source: PubMed Central journal article supplement (PMC7419564; doi:10.1038/s41408-020-00348-5), 2020-08-11
Supplement: 41408_2020_348_MOESM1_ESM.pdf [file 41408_2020_348_MOESM1_ESM.pdf]

**Supplementary material:**

**Supplementary Table S1:**

| First line induction treatment | ORR (≥PR) by cytogenetic abnormality n (%) |          |          |         |          |                       |           | P value          |
|--------------------------------|--------------------------------------------|----------|----------|---------|----------|-----------------------|-----------|------------------|
|                                | t(11;14)                                   | t(4;14)  | t(14;16) | t(6;14) | t(14;20) | Unknown IgH trans/del | Trisomies |                  |
| <b>Overall</b>                 | 253 (78)                                   | 137 (88) | 62 (90)  | 13 (76) | 15 (83)  | 162 (83)              | 557 (83)  | 0.11             |
| <b>PI</b>                      | 99 (80)                                    | 62 (90)  | 15 (79)  | 7 (100) | 6 (86)   | 50 (81)               | 134 (71)  | <b>0.01</b>      |
| <b>IMiD</b>                    | 76 (72)                                    | 35 (76)  | 16 (94)  | 2 (33)  | 1 (100)  | 58 (77)               | 261 (87)  | <b>&lt;0.001</b> |
| <b>PI+IMiD</b>                 | 72 (89)                                    | 38 (100) | 28 (97)  | 4 (100) | 7 (78)   | 48 (98)               | 148 (96)  | <b>0.03</b>      |
| <b>Other</b>                   | 6 (50)                                     | 2 (67)   | 3 (75)   | -       | 1 (100)  | 6 (67)                | 14 (45)   | 0.58             |

**Supplementary table S1: Overall response and primary cytogenetic abnormalities.** Comparison of overall response rate (ORR) to PI-, IMiD- and PI+IMiD- based first-line treatments between patients with different primary cytogenetic abnormalities: t(11;14), t(4;14), t(14;16), t(6;14), t(14;20), unknown IgH trans/del, trisomies without IgH translocation. Abbreviations: *del*: deletion, *IgH*: immunoglobulin heavy chain, *IMiD*: immunomodulatory drug, *PI*: proteasome inhibitor, *trans*: translocation.

**Supplementary table S2:**

| First line induction treatment | TTNT by cytogenetic abnormality median time (95%CI) (months) |                     |                     |                   |                     |                       |                     | P value          |
|--------------------------------|--------------------------------------------------------------|---------------------|---------------------|-------------------|---------------------|-----------------------|---------------------|------------------|
|                                | t(11;14)                                                     | t(4;14)             | t(14;16)            | t(6;14)           | t(14;20)            | Unknown IgH trans/del | Trisomies           |                  |
| <b>Overall</b>                 | 19.3<br>(15.6-23.3)                                          | 18.6<br>(14.1-22.0) | 20.3<br>(11.0-26.4) | 25.3<br>(2.4-NR)  | 32.0<br>(8.0-NR)    | 25.3<br>(18.3-30.0)   | 29.1<br>(26.2-32.0) | <b>&lt;0.001</b> |
| <b>PI</b>                      | 19.0<br>(10.7-25.1)                                          | 18.6<br>(13.3-22.4) | 18.0<br>(7.5-22.6)  | 40.6<br>(1.5-NR)  | NR<br>(14.7-NR)     | 18.1<br>(13.9-33.0)   | 18.2<br>(14.7-23.8) | 0.06             |
| <b>IMiD</b>                    | 19.3<br>(15.2-24.6)                                          | 10.4<br>(6.0-18.1)  | 13.3<br>(4.8-34.1)  | 11.0<br>(2.1-NR)  | 34.1<br>(25.4-42.8) | 26.0<br>(18.0-31.2)   | 32.1<br>(28.6-38.7) | <b>&lt;0.001</b> |
| <b>PI+IMiD</b>                 | 19.7<br>(14.0-29.8)                                          | 29.4<br>(23.6-36.8) | 26.7<br>(11.0-NR)   | 12.8<br>(0.86-NR) | 19.8<br>(3.2-38.1)  | 31.0<br>(31.1-65.2)   | 44.0<br>(35.1-51.1) | <b>0.02</b>      |
| <b>Other</b>                   | 3.7<br>(2.2-76.7)                                            | 2.4<br>(1.3-25.6)   | 10.0<br>(4.5-11.9)  | -                 | 1.3                 | 30.6<br>(2.3-80.4)    | 7.8<br>(3.5-22.4)   | <b>&lt;0.001</b> |

**Supplementary table S2: TTNT and primary cytogenetic abnormalities.** Comparison of the time to next treatment (TTNT) with PI-, IMiD- and PI+IMiD- based first line treatments between patients with primary cytogenetic abnormalities: t(11;14), t(4;14), t(14;16), t(6;14), t(14;20), unknown IgH trans/del, trisomies without IgH translocation. *Abbreviations: del: deletion, IgH: immunoglobulin heavy chain, IMiD: immunomodulatory drug, PI: proteasome inhibitor, trans: translocation*

**Supplementary figure S1:**

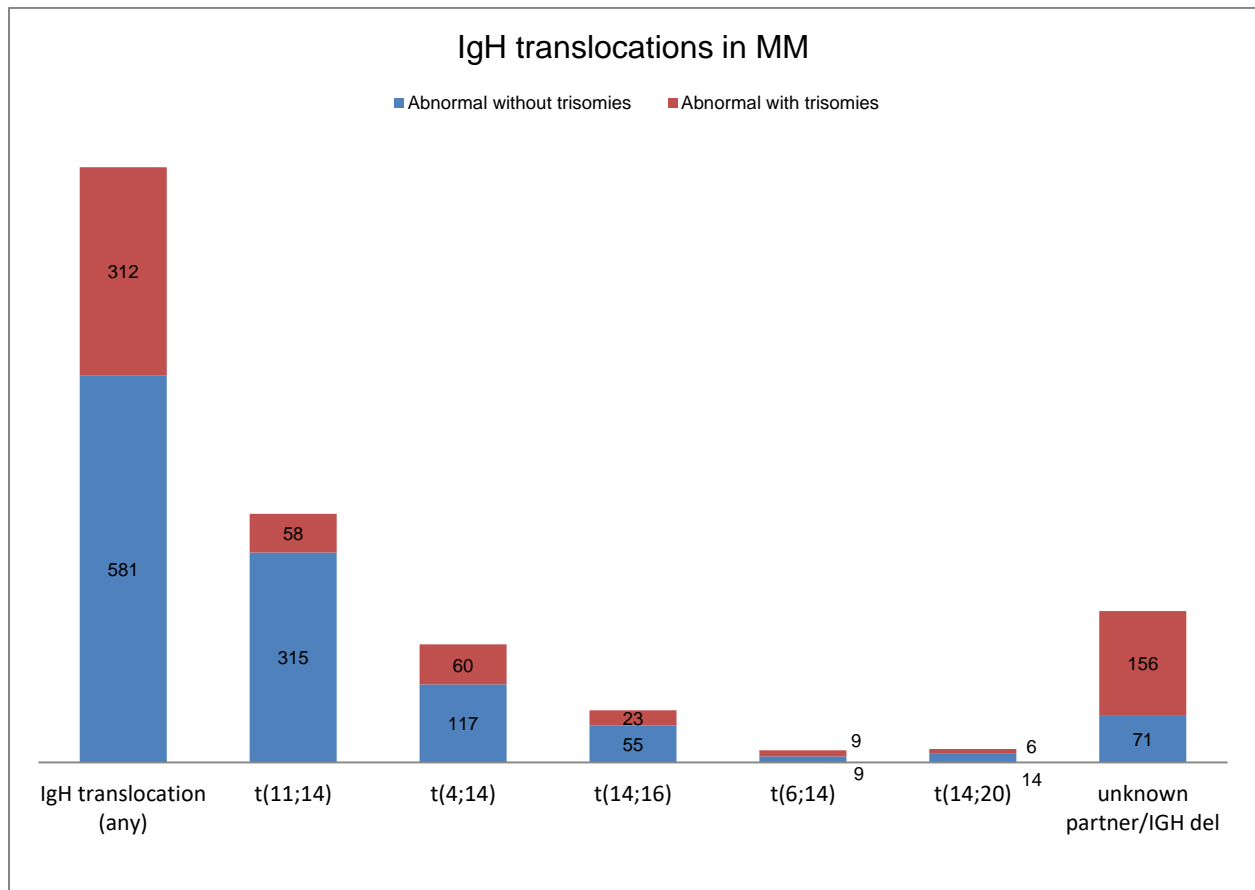

**Supplementary figure S1: IgH translocations in patients with MM.** Number of patients with FISH-detected IgH translocations in the presence of trisomies (red) and IgH translocations in the absence of trisomies (blue).

*Abbreviations: del: deletion, IgH: immunoglobulin heavy chain locus, MM: multiple myeloma*

**Supplementary figure S2:**

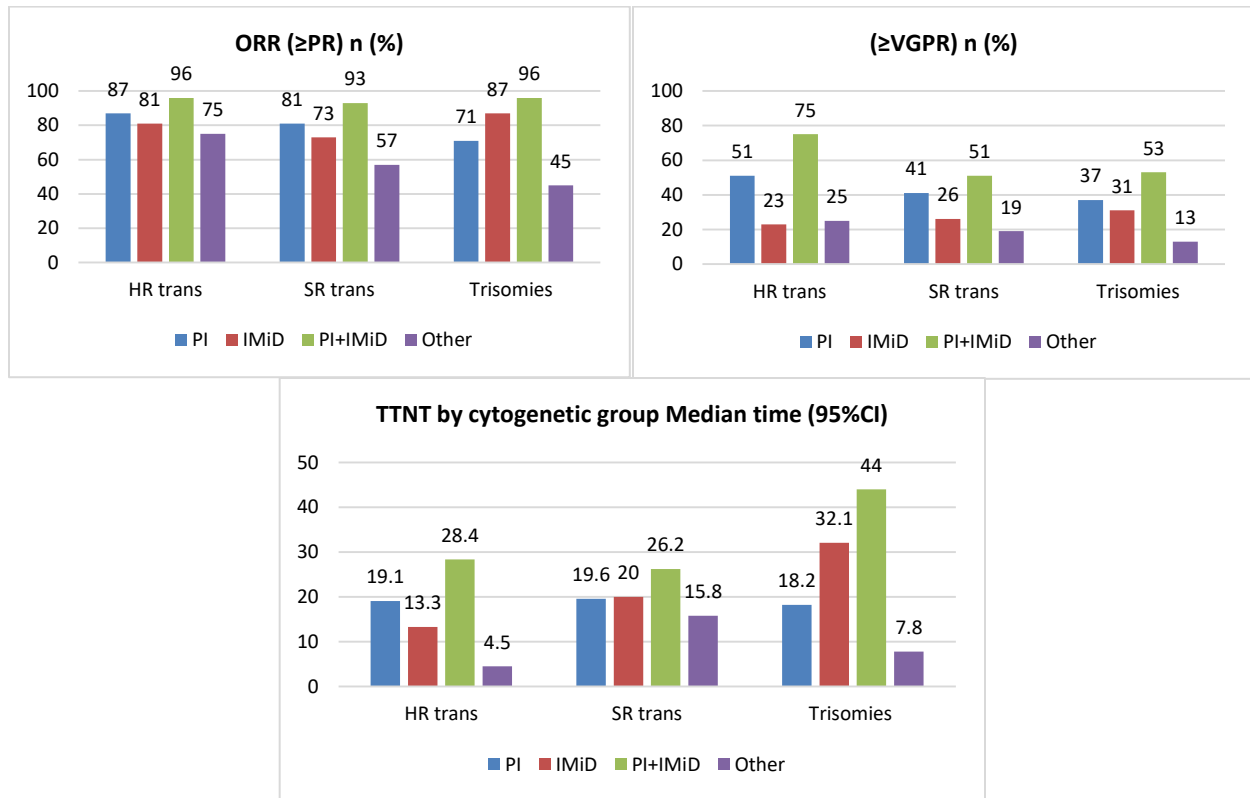

**Supplementary figure S2: Treatment outcomes for HR translocation, SR translocation and trisomies groups.**

Comparison of a) overall response rate, b)  $\geq$  VGPR rate and c) time to next treatment with PI-based (blue), IMiD-based (red), PI+IMiD-based (green) and other (purple) first-line treatments for patients with HR IgH translocations, SR IgH translocations, and trisomies. Abbreviations: *HR*: high-risk, *IgH*: immunoglobulin heavy chain, *IMiD*: immunomodulatory drug, *PI*: proteasome inhibitor, *SR*: standard-risk, *trans*: translocation, *VGPR*: very good partial response.
